# Supplementary material
Source: PubMed Central journal article supplement (PMC6309308)
Supplement: NIHMS1510970-supplement-1.pdf [file NIHMS1510970-supplement-1.pdf]

# **Epidithiodiketopiperazines inhibit protein degradation by targeting proteasome deubiquitinase Rpn11**

Jing Li<sup>1,8,\*</sup>, Yaru Zhang<sup>1,8</sup>, Bruno Da Silva Sil Dos Santos<sup>2</sup>, Feng Wang<sup>3</sup>, Yuyong Ma<sup>4</sup>, Christian Perez<sup>4</sup>, Yanling Yang<sup>5</sup>, Junmin Peng<sup>5</sup>, Seth M. Cohen<sup>4</sup>, Tsui-Fen Chou<sup>3</sup>, Stephen T. Hilton<sup>6</sup> and Raymond J. Deshaies<sup>1,7,8,9,\*</sup>

<sup>1</sup>Division of Biology and Biological Engineering, Box 114-96, California Institute of Technology, Pasadena, CA 91125

<sup>2</sup>London Metropolitan University, 166-220 Holloway Road, London N7 8DB, United Kingdom

<sup>3</sup>Division of Medical Genetics, Department of Pediatrics, Harbor-UCLA Medical Center and Los Angeles Biomedical Research Institute, Torrance, California 90502, USA

<sup>4</sup>Department of Chemistry and Biochemistry, University of California San Diego, La Jolla, CA 92093

<sup>5</sup>Departments of Structural Biology and Developmental Neurobiology, St Jude Children's Research Hospital, Memphis, TN 38105

<sup>6</sup>UCL School of Pharmacy, 29-39 Brunswick Square, London, WC1N 1AX, United Kingdom

<sup>7</sup>Howard Hughes Medical Institute

<sup>8</sup>Amgen Discovery Research, One Amgen Center Drive MS 29-M-B, Thousand Oaks, CA 91320

<sup>9</sup>Lead contact

\*Correspondence: jing.li@caltech.edu (J.L.), deshaies@caltech.edu (R.J.D.)

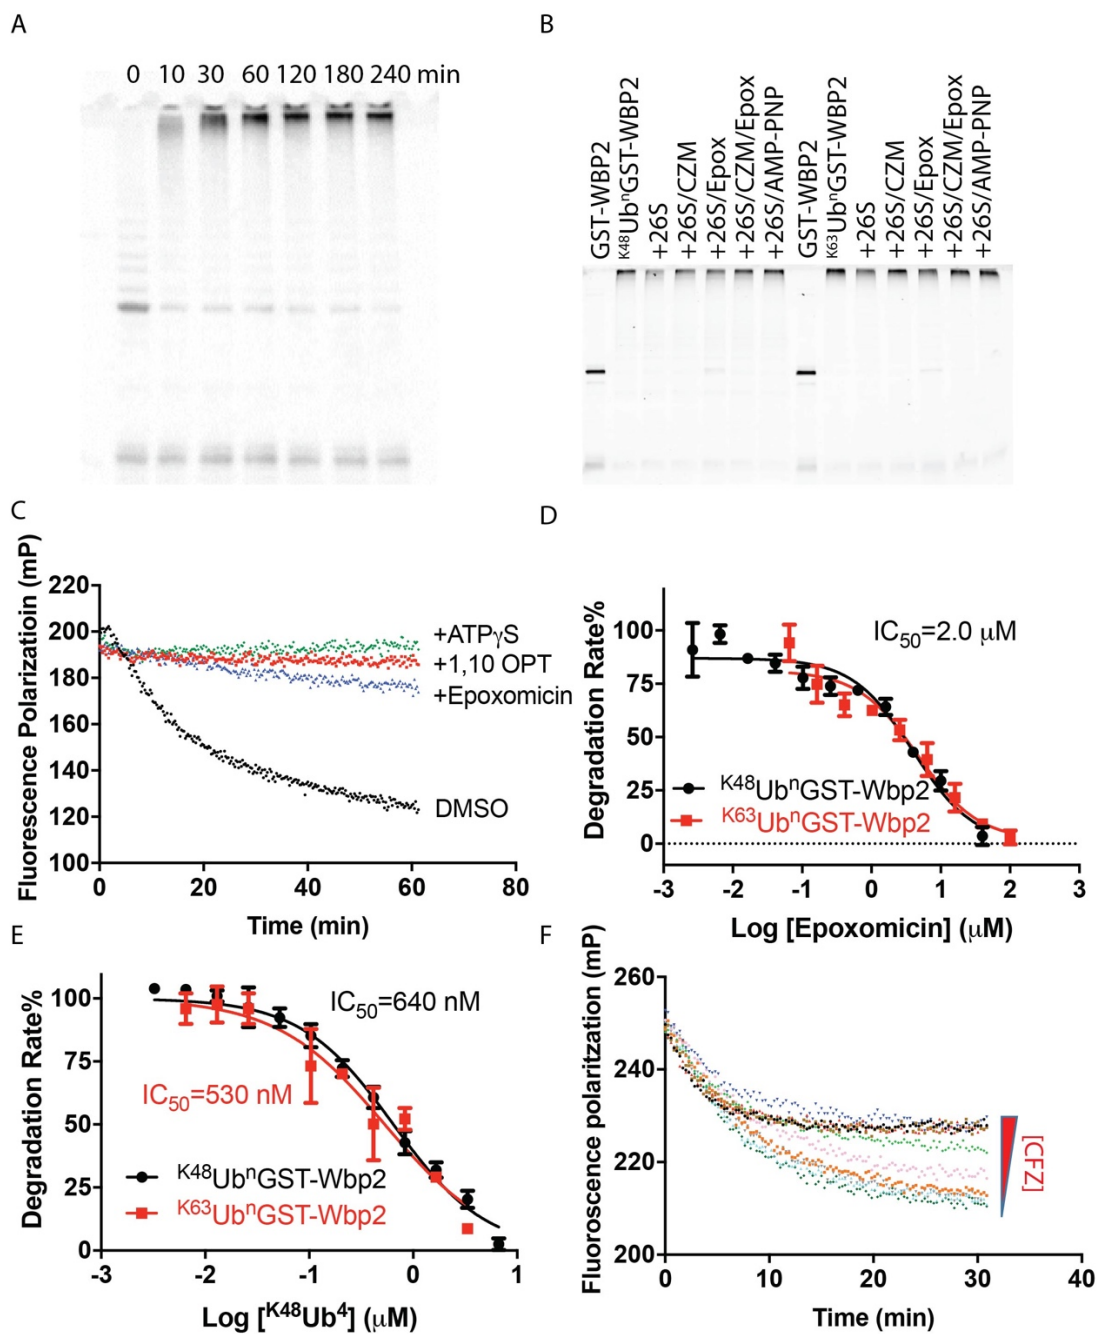

**Figure S1. Development of an assay to monitor protein degradation.** Related to **Figure 1** (A) *in vitro* ubiquitination of GST-Wbp2 with Ube1, UbcH5a and Rsp5-E6AP at room temperature. Reactions were fractionated by SDS-PAGE and analyzed using a Typhoon fluorescence scanner at different time points as indicated. (B) Proteasomal degradation of Ub<sup>n</sup>GST-Wbp2. 20 nM  $K^{48}Ub^n$ GST-Wbp2 was incubated with 2.5 nM 26S proteasome at 37°C for 2 hours in the absence and presence of different inhibitors (20  $\mu$ M CZM or 5  $\mu$ M epoxomicin/Epox or 1 mM AMP-PNP). Reactions were fractionated by SDS-PAGE and analyzed using a Typhoon fluorescence scanner. (C) Measurement of proteasome activity using fluorescence polarization assay.  $K^{48}Ub^n$ GST-Wbp2 (2.5 nM) was incubated with 1 nM 26S proteasome at 37°C in the absence or presence of different inhibitors (10  $\mu$ M Epox or 2 mM ATP $\gamma$ S or 2 mM 1,10-phenanthroline (1,10-PT)). (D) Epoxomicin inhibits the degradation of the Wbp2 substrate. Shown is the dose-response curve of proteasome activity measured at 37°C using Ub<sup>n</sup>GST-Wbp2 as substrate and proteasome with different concentrations of epoxomicin. (E) Shown are the dose-response curves of proteasome activity measured at 37°C using Ub<sup>n</sup>GST-Wbp2 as substrate and proteasome in the presence of different concentrations of K48-linked Ub4. (F) Shown is the reaction kinetics measured at 37°C using  $K^{63}Ub^n$ GST-Wbp2 as substrate and lysate from cells treated with different concentrations of carfilzomib.

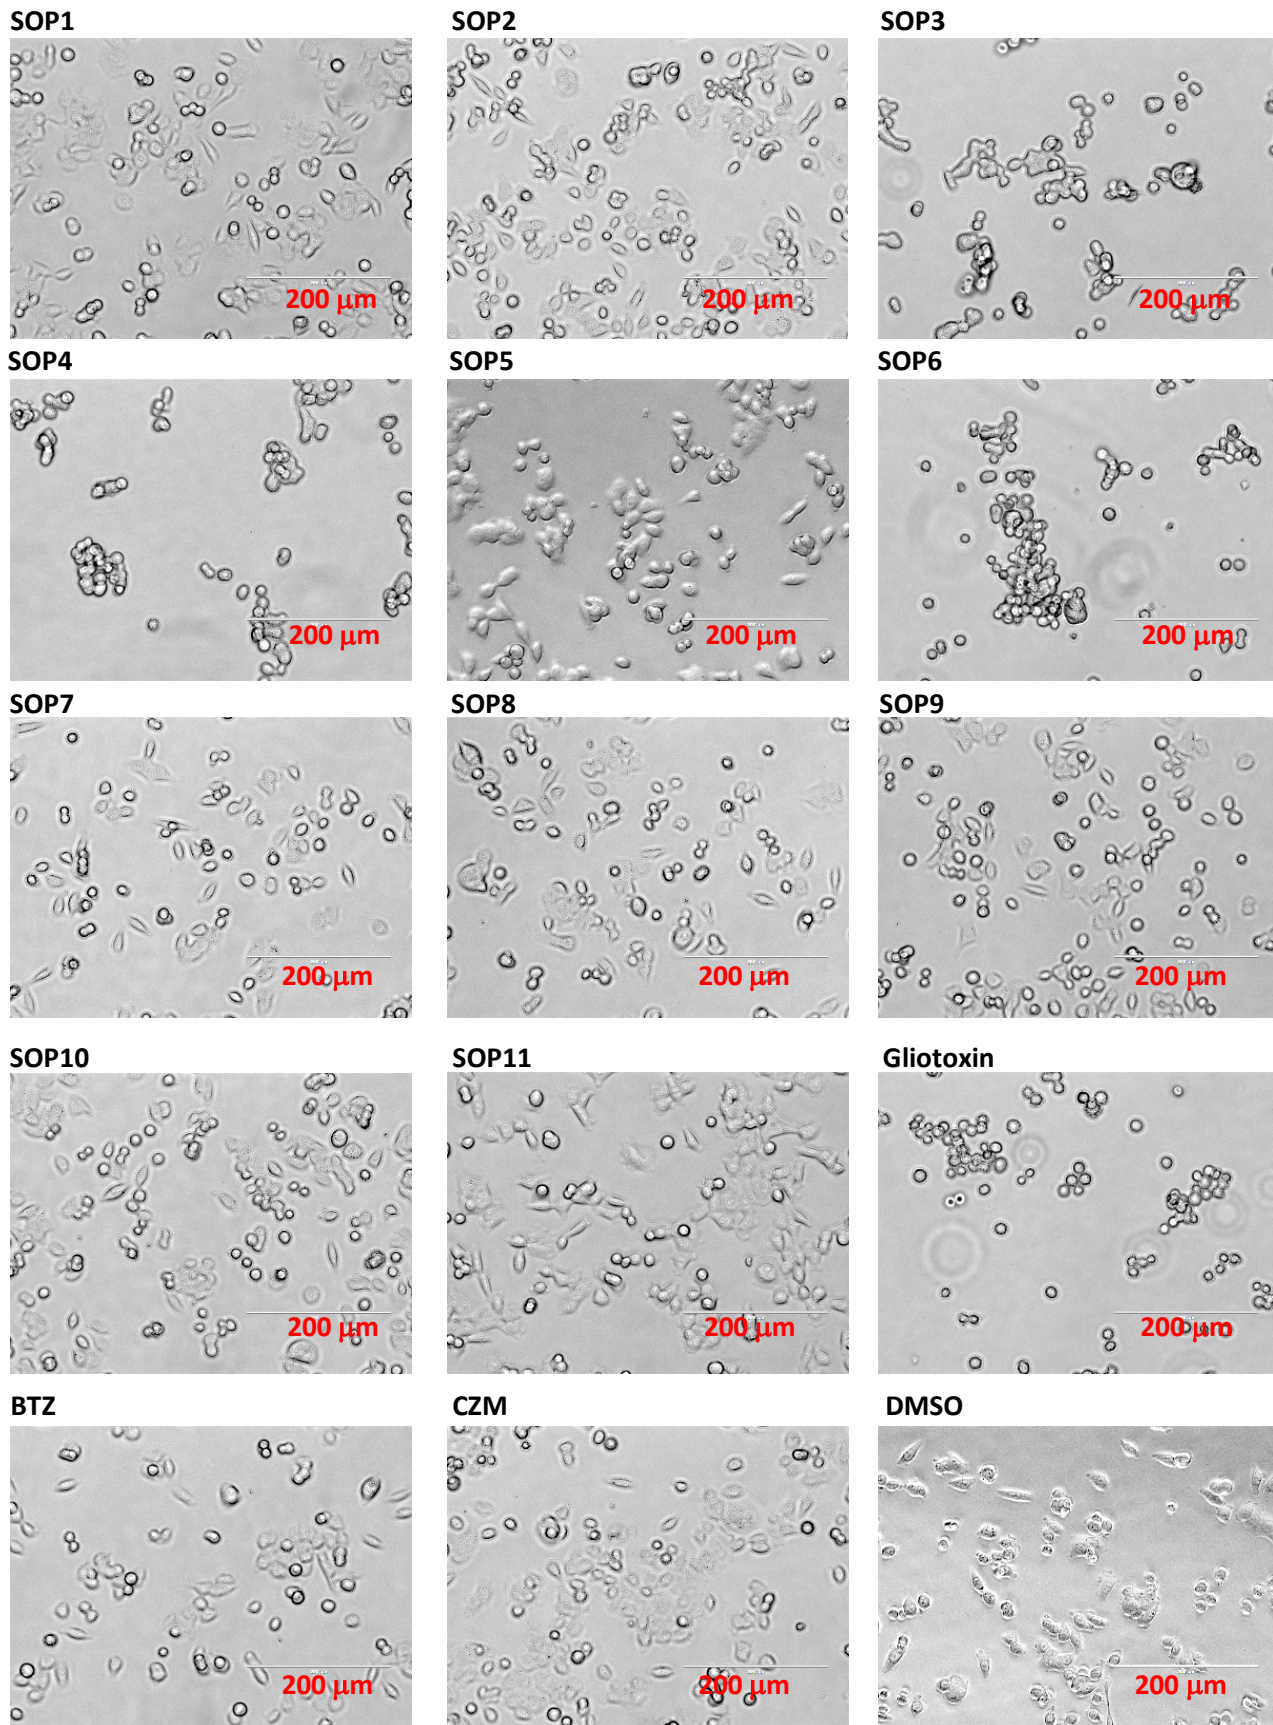

**Figure S2. Effects on the cell morphology.** Related to **Figure 4**. Shown are microscopic images of HCT116 cells, taken 3 hours after treatment with 10 μM of the indicated compounds except for BTZ, which was used at 1 μM.

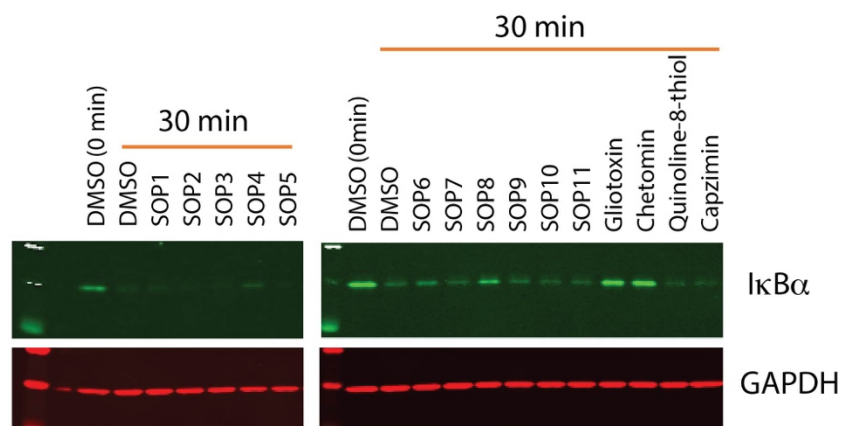

**Figure S3. Screening the effects of ETPs on the degradation of IκBα in TNF-α-stimulated HeLa cells.** Related to **Figure 4**. HeLa cells were stimulated with TNF-α for 30 mins in the presence of 1 μM compounds as indicated. Degradation of IκBα was evaluated by western blot.

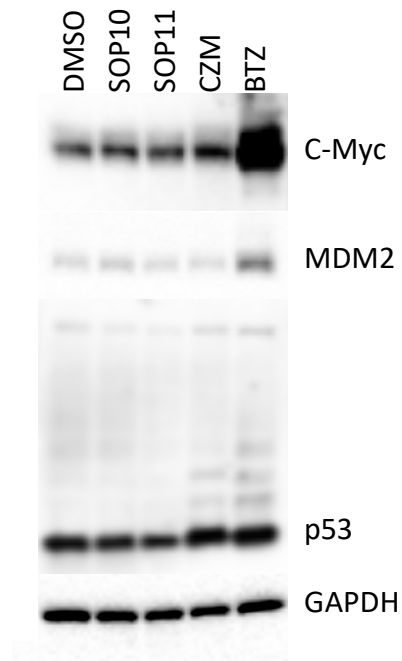

**Figure S4. ETP showed little effect on stabilization of multiple proteasome substrates.** Related to **Figure 4**. HCT116 cells were incubated with either ETP compounds (10  $\mu$ M), CZM (10  $\mu$ M), or BTZ (1  $\mu$ M) for 6 hours, and cell lysates were fractionated by SDS-PAGE and immunoblotted with antibodies against c-Myc, MDM2, p53 or GAPDH.

|                                             | <b>K63 (%)</b>    | <b>K48 (%)</b>    | <b>K33 (%)</b>   | <b>K29 (%)</b>      | <b>K27 (%)</b>   | <b>K11 (%)</b>   | <b>K6 (%)</b>    |
|---------------------------------------------|-------------------|-------------------|------------------|---------------------|------------------|------------------|------------------|
| <b><sup>K63</sup>Ub<sup>n</sup>GST-Wbp2</b> | <b>94.13±0.28</b> | <b>1.69±0.06</b>  | <b>0.34±0.03</b> | <b>2.13±0.03</b>    | <b>0.04±0.01</b> | <b>1.49±0.16</b> | <b>0.19±0.02</b> |
| <b><sup>K48</sup>Ub<sup>n</sup>GST-Wbp2</b> | <b>5.29±0.06</b>  | <b>87.18±1.60</b> | <b>0.22±0.03</b> | <b>Not detected</b> | <b>0.03±0.00</b> | <b>3.78±0.27</b> | <b>3.52±0.67</b> |

**Table S1. Mass spectrometry characterization of the polyubiquitinated GST-Wbp2. Related to Figure 1.**

| Reference | Structure                                                                           | Rpn11<br>IC <sub>50</sub> (μM) | Csn5<br>IC <sub>50</sub> (μM) | AMSH<br>IC <sub>50</sub> (μM) | Ub <sup>G76V</sup> GFP<br>IC <sub>50</sub> (μM) | GI <sub>50</sub><br>(μM) |
|-----------|-------------------------------------------------------------------------------------|--------------------------------|-------------------------------|-------------------------------|-------------------------------------------------|--------------------------|
| SOP1      | 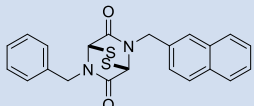   | 2.6±0.6                        | 0.2±0.06                      | 0.6±0.04                      | 5.7±0.6                                         | 8.6±2.0                  |
| SOP2      |    | 1.1±0.3                        | 1.2±0.3                       | 3.2±0.2                       | 10.7±1.6                                        | >20                      |
| SOP3      |    | 1.3±0.4                        | 0.4±0.1                       | 0.5±0.04                      | 5.0±0.8                                         | 5.7±1                    |
| SOP4      |    | 0.2±0.05                       | 0.5±0.1                       | 0.3±0.04                      | 14.6±3.1                                        | 5.8±1                    |
| SOP5      |    | 3.1±1.0                        | 0.7±0.3                       | 1.0±0.1                       | 8.0±1.1                                         | >20                      |
| SOP6      |   | 3.8±1.2                        | 2.9±0.5                       | 2.1±0.2                       | 4.6±1.2                                         | 1.4±0.1                  |
| SOP7      |  | >100                           | >100                          | >100                          | >50                                             | >100                     |
| SOP8      |  | 3.7±1                          | 1.2±0.2                       | 0.9±0.04                      | >20                                             | >20                      |
| SOP9      |  | 1.9±0.4                        | 0.9±0.3                       | 0.4±0.03                      | >20                                             | >20                      |
| SOP10     |  | 0.7±0.2                        | 0.6±0.2                       | 1.0±0.04                      | 4.6±1.1                                         | 8.2±1.0                  |
| SOP11     |  | 1.3±0.3                        | 0.6±0.2                       | 0.9±0.1                       | 2.7±0.7                                         | 4.7±0.5                  |
| Gliotoxin |  | 6.9±3.4                        | 14±3                          | 3.6±0.6                       | 0.4                                             | 0.3±0.04                 |

Table S2. Summary table of the ETPs. Related to Figure 3 and Figure 5.
